# Supplementary material for: Ancestral polyploidy in seed plants and angiosperms
Source: Springer Nature journal article supplement (doi:10.1038/nature09916), 2011-04-08
Supplement: 41586_2011_BFnature09916_MOESM287_ESM.pdf [file 41586_2011_BFnature09916_MOESM287_ESM.pdf]

## Supplementary Discussion

### **$K_s$ analysis**

The topological evidence overwhelmingly supports a shared genome-scale duplication by all angiosperms. This finding of ancient gene duplication contrasts with earlier studies based on  $K_s$  distributions of duplicated genes in basal angiosperms using much smaller numbers of ESTs<sup>16,55</sup>. The previous analyses had detected evidence of an ancient WGD event in several basal angiosperms, but not in *Amborella*, the sister to all other extant angiosperms<sup>56</sup>. However,  $K_s$  analysis with the greatly expanded set of ESTs (2,592,984) from *Amborella* can now detect two significant ancient duplication peaks: 1.97 and 2.76 (Supplementary Fig. 7). Furthermore, forty-three *Amborella* unigene pairs were identified from transcriptome  $K_s$  analysis where both genes mapped to a phylogenetic tree. Gene pairs with small  $K_s$  values ( $<1.5$ ) were duplicated after the divergence of *Amborella* and the rest of the angiosperms, while gene pairs with large  $K_s$  values were generated by ancient duplications in the phylogenetic trees (Supplementary Table 5). The results are generally consistent between the  $K_s$  and phylogenomic timing analyses. Therefore, both phylogenetic and  $K_s$  analyses of very large EST datasets provide strong evidence for a concentration of duplication events prior to the origin of angiosperms.

### **Synteny analysis of ancient gene duplications**

A graph-based analysis of synteny<sup>57</sup> in the *Vitis* genome was performed in order to further test the hypothesis that two ancient WGDs occurred before the divergence of monocots and eudicots and the more recent paleohexaploidy event<sup>9</sup>,  $\gamma$ <sup>12</sup>, that has been characterized in *Vitis* and other available eudicot genomes. A total of 2322 sets of *Vitis* genes in 571 orthogroups showing evidence of gene duplication before the monocot-eudicot divergence (Analysis I described above; Supplementary Data 4) were used to test for the existence of syntenic blocks (i.e. collinear redundancy) in addition to those that have already been described as biproducts of the  $\gamma$  triplication<sup>9,12,58</sup>. Over time, rearrangements and gene loss following WGD are expected to degrade synteny between duplicated blocks in an ancient paleopolyploid genome<sup>7,9,12,15</sup>, but using the approach of Dehal and Boore<sup>57</sup> we did find suggestive patterns of loose synteny among multiple segments that are hypothesized to have been derived from pre- $\gamma$  duplication events

(Supplementary Data 4). Gene phylogenies were used to define genes along each *Vitis* chromosome representing the pre- $\gamma$  ancestral genome (Supplementary Fig. 8) and matches between these genes were used to anchor searches for 2 or more shared genes within 200 gene windows (100 genes on either side of anchor) across the *Vitis* genome. Whereas a single pre- $\gamma$  WGD would be diagnosable with up to 4-fold collinear redundancy along each chromosome, two pre- $\gamma$  WGDs could be evidenced with a maximum of 10-fold collinear redundancy (Supplementary Fig. 8a). However, these levels of collinearity are expected to be rare given the processes of gene fractionation following WGDs<sup>7,9,15,58</sup> and structural mutations independent of WGDs. Inspection of the synteny graphs reveals that 5-fold collinear redundancy is the most common pattern in the *Vitis* genome (Supplementary Fig. 8b), meaning that the largest fraction of genes shared another 4 paralogous regions. This result supports the phylogenomic inference that at least two pre- $\gamma$  WGDs contributed to the complexity of angiosperm genomes.

### MADS-box transcription factors

Many MADS-box transcription factors are important regulators of plant development, particularly as regulators of floral organ identity. Previous phylogenetic analyses of the *AGAMOUS* (*AG*), *APETALA3* (*AP3*)/*PISTILLATA* (*PI*), and *SEPALLATA* (*SEP*) MADS-box subfamilies indicated that these gene families experienced duplication prior to the eudicot-monocot divergence<sup>59-62</sup>. The placement of basal angiosperm genes indicates that the duplication events in the *AG*, *AP3/PI*, and *SEP* subfamilies predate the diversification of extant angiosperms<sup>60-63</sup>. These duplications are therefore consistent with WGD before the origin of the angiosperms. Furthermore, the *SEP* and *AGL6* subfamilies are sister clades formed by a duplication event that likely occurred before the split of angiosperms and gymnosperms<sup>61</sup>, a duplication that is possibly the same as the seed plant-wide WGD documented here. The duplication events and subsequent evolution of expression patterns and functions of these MADS-box components of the ABCE model have likely contributed to the wide spectrum of morphological diversification of flowers<sup>61,64</sup>.

### Supplementary References

- 55 Soltis, D. E. *et al.* Polyploidy and angiosperm diversification. *Am. J. Bot.* **96**, 336-348 (2009).
- 56 Soltis, P. S., Soltis, D. E. & Chase, M. W. Angiosperm phylogeny inferred from multiple genes as a tool for comparative biology. *Nature* **402**, 402-404 (1999).
- 57 Dehal, P. & Boore, J. L. Two rounds of whole genome duplication in the ancestral vertebrate. *PLoS Biol.* **3**, e314 (2005).
- 58 Sankoff, D. *et al.* Towards improved reconstruction of ancestral gene order in angiosperm phylogeny. *J. Comput. Biol.* **16**, 1353-1367 (2009).
- 59 Kramer, E. M., Dorit, R. L. & Irish, V. F. Molecular evolution of genes controlling petal and stamen development: duplication and divergence within the *APETALA3* and *PISTILLATA* MADS-box gene lineages. *Genetics* **149**, 765-783 (1998).
- 60 Kramer, E. M., Jaramillo, M. A. & Di Stilio, V. S. Patterns of gene duplication and functional evolution during the diversification of the *AGAMOUS* subfamily of MADS box genes in angiosperms. *Genetics* **166**, 1011-1023 (2004).
- 61 Zahn, L. M. *et al.* The evolution of the *SEPALLATA* subfamily of MADS-box genes: a preangiosperm origin with multiple duplications throughout angiosperm history. *Genetics* **169**, 2209-2223 (2005).
- 62 Zahn, L. M. *et al.* Conservation and divergence in the *AGAMOUS* subfamily of MADS-box genes: evidence of independent sub- and neofunctionalization events. *Evol. Dev.* **8**, 30-45 (2006).
- 63 Stellari, G. M., Jaramillo, M. A. & Kramer, E. M. Evolution of the *APETALA3* and *PISTILLATA* lineages of MADS-box-containing genes in the basal angiosperms. *Mol. Biol. Evol.* **21**, 506-519 (2004).
- 64 Ma, H. & dePamphilis, C. The ABCs of floral evolution. *Cell* **101**, 5-8 (2000).

**Supplementary Table 1: Summary of datasets for nine sequenced plant genomes included in this study.** Analyzed gene number is the number of genes contained in the core-orthogroups having at least one monocot and one eudicot, and one *Selaginella* and/or *Physcomitrella* sequence, which is the minimum requirement for the detection of a possible ancient duplication prior to the divergence of monocots and eudicots by a phylogenetic approach.

| Species                                        | Annotation version | Annotated genes | Analyzed genes |
|------------------------------------------------|--------------------|-----------------|----------------|
| <i>Arabidopsis thaliana</i><br>Thale cress     | TAIR version 9     | 27379           | 11669          |
| <i>Carica papaya</i><br>Papaya                 | ASGPB release      | 25536           | 8713           |
| <i>Cucumis sativus</i><br>Cucumber             | BGI release        | 21635           | 9985           |
| <i>Populus trichocarpa</i><br>Black cottonwood | JGI version 2.0    | 41377           | 15050          |
| <i>Vitis vinifera</i><br>Grape vine            | Genoscope release  | 30434           | 11020          |
| <i>Oryza sativa</i><br>Rice                    | RGAP release 6.1   | 56979           | 14483          |
| <i>Sorghum bicolor</i>                         | JGI version 1.4    | 34496           | 11258          |
| <i>Selaginella moellendorffii</i>              | JGI version 1.0    | 34697           | 16711          |
| <i>Physcomitrella patens</i>                   | JGI version 1.1    | 35938           | 12551          |

**Supplementary Table 2: Summary of unigene sequences of basal angiosperm and gymnosperm ESTs and unigenes included in phylogenetic study.** Gymnosperm data (except *Zamia vazquezii*) are from TIGR PTA database (<http://plantta.jcvi.org/>). Sequences and assemblies for basal angiosperms and *Zamia vazquezii* data (12,660,332 previously unreported ESTs) are available at the AAGP project website (Ancestral Angiosperm Genome Project) (<http://ancangio.uga.edu/>); data for these species will be described in detail in additional papers. Legend: # EST = total number of ESTs in the database; # Unigenes = total number of unigenes; # Included = total number of unigenes assembled in the core-orthogroups with one or more monocot + eudicot duplications.

|                           | SPECIES (COMMON NAME)                              | # EST    | # Unigenes | # Included |
|---------------------------|----------------------------------------------------|----------|------------|------------|
| Gymnosperms               | <i>Chamaecyparis obtusa</i> (Hinoki false cypress) | 5830     | 4061       | 583        |
|                           | <i>Cryptomeria japonica</i> (Japanese cedar)       | 16187    | 9098       | 1121       |
|                           | <i>Cycas rumphii</i> (Cycad)                       | 7899     | 4335       | 616        |
|                           | <i>Ginkgo biloba</i> (Ginkgo)                      | 5940     | 4178       | 478        |
|                           | <i>Gnetum gnemon</i> (Melinjo)                     | 3920     | 2859       | 195        |
|                           | <i>Picea abies</i> (Norway spruce)                 | 10030    | 5204       | 608        |
|                           | <i>Picea engelmannii</i> x <i>Picea glauca</i>     | 28160    | 14201      | 1831       |
|                           | <i>Picea glauca</i> (White spruce)                 | 132151   | 49412      | 7782       |
|                           | <i>Picea sitchensis</i> (Sitka spruce)             | 98987    | 25425      | 3047       |
|                           | <i>Pinus pinaster</i> (Maritime pine)              | 13067    | 9166       | 2336       |
|                           | <i>Pinus taeda</i> (Loblolly pine)                 | 326641   | 78873      | 11006      |
|                           | <i>Pseudotsuga menziesii</i> (Douglas fir)         | 18100    | 12074      | 291        |
|                           | <i>Taiwania cryptomerioides</i> (Coffin tree)      | 1407     | 778        | 66         |
|                           | <i>Welwitschia mirabilis</i> (Tree tumbo)          | 10122    | 6680       | 1408       |
|                           | " <i>Zamia fischeri</i> "                          | 8248     | 7374       | 345        |
|                           | <i>Zamia vazquezii</i>                             | 603139   | 50336      | 4067       |
| Basal Angiosperms         | <i>Aristolochia fimbriata</i> (Dutchman's pipe)    | 3828275  | 155371     | 5154       |
|                           | <i>Liriodendron tulipifera</i> (Yellow-poplar)     | 2012281  | 141494     | 11582      |
|                           | <i>Nuphar advena</i> (Yellow pond lily)            | 3623653  | 289773     | 27588      |
|                           | <i>Amborella trichopoda</i>                        | 2592984  | 208394     | 11760      |
| Total number of sequences |                                                    | 13347021 | 1079086    | 91864      |

**Supplementary Table 3: Floral gene regulators surviving ancient**

**duplications.** In this study we identified 35 orthogroups that included genes known to regulate aspects of reproductive development in plants and containing at least one ancient gene duplication. “ME DUP” shows the number of duplications identified before the divergence of monocots and eudicots from 9-genome phylogenies. “Angio DUP” means number of angiosperm-wide duplications identified from phylogenetic trees that include basal angiosperms and gymnosperms. “Seed DUP” shows the number of seed plant-wide duplications indicated from phylogenetic trees that include basal angiosperms and gymnosperms. Numbers missing for both columns Angio DUP and Seed DUP mean the orthogroups have not been populated with unigenes of basal angiosperms and gymnosperms.

| Ortho ID | Representative Gene | Annotation                                                                                                                         | ME DUP | Angio DUP | Seed DUP |
|----------|---------------------|------------------------------------------------------------------------------------------------------------------------------------|--------|-----------|----------|
| 34       | AT1G75820           | CLV1, controls shoot and floral meristem size, and contributes to establish and maintain floral meristem identity                  | 2      |           |          |
| 58       | AT5G41170           | PPR, Pentatricopeptide repeat, expressed during petal differentiation and expansion stage                                          | 1      |           |          |
| 87       | AT1G68530           | CUT1, required for cuticular wax biosynthesis and pollen fertility                                                                 | 1      |           |          |
| 112      | AT4G04890           | PDF2, encodes a homeodomain protein that is expressed in the LI layer of the vegetative, floral and inflorescence meristems        | 1      | 1         | 1        |
| 126      | AT5G13930           | CHS, Chalcone synthase family, a key enzyme involved in the biosynthesis of flavonoids                                             | 1      | 1         |          |
| 163      | AT5G43810           | ARGONAUTE, along with WUS and CLV genes, controls the relative organization of central zone and peripheral zone cells in meristems | 1      |           |          |

|      |           |                                                                                                                                                                                                                                                                               |   |   |   |
|------|-----------|-------------------------------------------------------------------------------------------------------------------------------------------------------------------------------------------------------------------------------------------------------------------------------|---|---|---|
| 166  | AT3G61160 | Shaggy- related protein kinase beta / ASK-beta (ASK2), involved in protein amino acid phosphorylation                                                                                                                                                                         | 1 | 1 | 1 |
| 242  | AT1G07920 | EF-1-alpha, response to cadmium ion                                                                                                                                                                                                                                           | 1 |   |   |
| 245  | AT2G34710 | PHB, involved in adaxial/abaxial pattern formation, determination of bilateral symmetry, integument development, meristem initiation, polarity specification of adaxial/abaxial axis, primary shoot apical meristem specification, regulation of transcription, DNA-dependent | 1 | 1 | 1 |
| 309  | AT1G01040 | CAF, mutants convert the floral meristems to an indeterminate state, others yet show defects in ovule development                                                                                                                                                             | 1 |   |   |
| 361  | AT2G18790 | PHYTOCHROME, regulates the time of flowering and seed germination                                                                                                                                                                                                             | 1 | 1 | 1 |
| 423  | AT1G30330 | ARFs, Auxin response factors, act redundantly with ARF8 to control stamen elongation and flower maturation                                                                                                                                                                    | 1 |   |   |
| 454  | AT4G32551 | LEUNIG, regulates floral organ identity,gynoecium and ovule development. Negatively regulates AGAMOUS                                                                                                                                                                         | 1 |   | 1 |
| 576  | AT1G55680 | WD40 repeat, other                                                                                                                                                                                                                                                            | 1 |   | 1 |
| 595  | AT4G37750 | ANT, required for control of cell proliferation and encodes a putative transcriptional regulator similar to AP2                                                                                                                                                               | 1 |   |   |
| 643  | AT1G66340 | ETR1, Ethylene receptor, similar to prokaryote sensory transduction proteins                                                                                                                                                                                                  | 1 |   |   |
| 651  | AT3G58510 | DEAD box RNA helicase                                                                                                                                                                                                                                                         | 1 |   |   |
| 700  | AT2G42830 | SHP2, SHATTERPROOF 2 (AGL5), AG, MADS box protein                                                                                                                                                                                                                             | 1 |   | 1 |
| 752  | AT1G59750 | AUXIN RESPONSE FACTOR 1                                                                                                                                                                                                                                                       | 1 |   |   |
| 876  | AT5G57050 | ABI2, ABA INSENSITIVE                                                                                                                                                                                                                                                         | 1 |   |   |
| 1088 | AT4G08920 | HY4, ELONGATED HYPOCOTYL 4 (CRY1)                                                                                                                                                                                                                                             | 1 |   |   |
| 1141 | AT5G08390 | WD40 repeat                                                                                                                                                                                                                                                                   | 1 |   |   |
| 1168 | AT2G38630 | WD40 repeat-like                                                                                                                                                                                                                                                              | 1 |   |   |

|      |           |                                                                                                                                                                                   |   |   |   |
|------|-----------|-----------------------------------------------------------------------------------------------------------------------------------------------------------------------------------|---|---|---|
| 1172 | AT3G61240 | DEAD/DEAH box helicase                                                                                                                                                            | 1 |   |   |
| 1412 | AT1G68050 | FKF1, FLAVIN-BINDING KELCH DOMAIN F BOX PROTEIN, is clock-controlled and regulates transition to flowering                                                                        | 1 |   |   |
| 1429 | AT3G01540 | DEAD Box RNA helicases, CAF-like                                                                                                                                                  | 1 |   |   |
| 1538 | AT1G53230 | CYC3, CYCLOIDEA, TCP, involved in heterochronic regulation of leaf differentiation                                                                                                |   |   |   |
| 1676 | AT2G23380 | ICU1, INCURVATA 1, required for stable repression of AG and AP3                                                                                                                   | 1 |   |   |
| 1711 | AT5G63120 | DEAD box RNA helicase, putative (RH20)                                                                                                                                            | 1 |   | 1 |
| 1848 | AT1G69310 | WRKY                                                                                                                                                                              | 1 |   |   |
| 2833 | AT3G23350 | ENTH domain-containing protein/clathrin assembly protein-related, expressed in leaf whorl, petal, flower; EXPRESSED DURING: 4 anthesis, petal differentiation and expansion stage | 1 | 1 |   |
| 2920 | AT5G10630 | EF-1-alpha, putative, GTP binding, translation elongation factor activity, GTPase activity, zinc ion binding                                                                      | 1 |   |   |
| 3676 | AT3G56400 | WRKY                                                                                                                                                                              | 1 |   |   |
| 4072 | AT2G44745 | WRKY                                                                                                                                                                              | 1 |   |   |
| 4129 | AT2G37630 | AS1, Asymmetric leaves1, encodes a MYB-domain protein involved in specification of the leaf proximodistal axis                                                                    | 1 |   |   |



### Supplementary Table 4: List of plant photographs and photo credits used in Fig. 3.

#### Top row, left to right: eudicots

*Arabidopsis thaliana*: Yi Hu

*Aquilegia chrysantha*: G.A. Cooper (<http://persoon.si.edu/PlantImages>)

*Cirsium pumilum*: West Virginia University Herbarium (<http://persoon.si.edu/PlantImages>)

*Eschscholzia californica*: Yi Hu

#### Second row, left to right: monocots

*Trilium erectum*: Joel McNeal

*Bromus kalmii*: Joel McNeal

*Arisaema triphyllum*: Joel McNeal

*Cypripedium acaule*: Joel. McNeal

#### Third row, left to right: basal angiosperms

*Amborella trichopoda*: Sangtae Kim

*Liriodendron tulipifera*: Haiying Liang

*Nuphar advena*: Yi Hu

*Aristolochia fimbriata*: Stefan Wanke

#### Fourth row, left to right

*Zamia vazquezii* (a cycad, gymnosperm): Dennis Stevenson

*Pseudotsuga menziesii* (Douglas fir, a gymnosperm): B. Legler (<http://www.biodiversity.wa.gov>)

*Selaginella mollendorffii* (lycophyte, vegetative): Mike Axtell

*Physcomitrella patens* (moss): Mike Axtell

**Supplementary Table 5: Consistency of inferred duplications from independent  $K_s$  analysis of *Amborella* transcriptome and phylogenomic analysis.** 43 unigene gene pairs were identified from transcriptome  $K_s$  analysis where both genes mapped to a phylogenetic tree in Analysis IV. “Duplication Time” shows the duplication pattern inferred from phylogenetic tree (Seed dup = Seed plant-wide duplication; Angiosperm dup = Angiosperm-wide duplication, with gymnosperm outgroup root; “Ancient dup” refers to gene families with angiosperm-wide duplication, but without a gymnosperm outgroup root; “Recent dup” indicates that the duplication occurred after the divergence between *Amborella* and rest of the angiosperms). The results are generally consistent between the  $K_s$  and phylogenomic timing analyses.

| Gene 1              | Gene 2              | $K_s$  | ORTHO | Duplication Time |
|---------------------|---------------------|--------|-------|------------------|
| Amborella_b4_c10793 | Amborella_b4_c18179 | 2.9327 | 1616  | Seed dup         |
| Amborella_b4_c304   | Amborella_b4_c6763  | 2.9201 | 1104  | Angiosperm dup   |
| Amborella_b4_c24813 | Amborella_b4_c903   | 2.8264 | 384   | Seed dup         |
| Amborella_b4_c13924 | Amborella_b4_c5891  | 2.773  | 997   | Angiosperm dup   |
| Amborella_b4_c52686 | Amborella_b4_c642   | 2.7691 | 1051  | Seed dup         |
| Amborella_b4_c2641  | Amborella_b4_c4013  | 2.7257 | 385   | Ancient dup      |
| Amborella_b4_c3510  | Amborella_b4_c416   | 2.6857 | 1045  | Angiosperm dup   |
| Amborella_b4_c45137 | Amborella_b4_c8336  | 2.6479 | 632   | Seed dup         |
| Amborella_b4_c182   | Amborella_b4_c2514  | 2.6434 | 849   | Seed dup         |
| Amborella_b4_c1485  | Amborella_b4_c45698 | 2.3394 | 2313  | Ancient dup      |
| Amborella_b4_c45    | Amborella_b4_c650   | 2.2687 | 166   | Angiosperm dup   |
| Amborella_b4_c1979  | Amborella_b4_c569   | 2.1382 | 2384  | Ancient dup      |
| Amborella_b4_c464   | Amborella_b4_c662   | 2.0983 | 513   | Angiosperm dup   |
| Amborella_b4_c12254 | Amborella_b4_c1873  | 1.9299 | 50    | Angiosperm dup   |
| Amborella_b4_c173   | Amborella_b4_c5177  | 1.9165 | 932   | Angiosperm dup   |
| Amborella_b4_c7837  | Amborella_b4_c8759  | 1.9157 | 174   | Angiosperm dup   |
| Amborella_b4_c5282  | Amborella_b4_c6224  | 1.8744 | 1648  | Angiosperm dup   |
| Amborella_b4_c1711  | Amborella_b4_c54947 | 1.8423 | 606   | Angiosperm dup   |
| Amborella_b4_c15841 | Amborella_b4_c5262  | 1.7058 | 231   | Angiosperm dup   |
| Amborella_b4_c2852  | Amborella_b4_c7861  | 1.529  | 468   | Angiosperm dup   |
| Amborella_b4_c13559 | Amborella_b4_c7335  | 1.4656 | 611   | Angiosperm dup   |
| Amborella_b4_c13082 | Amborella_b4_c37    | 1.45   | 7000  | Ancient dup      |

|                         |                         |        |      |            |
|-------------------------|-------------------------|--------|------|------------|
| Amborella_b4_c10026     | Amborella_b4_c1753      | 1.533  | 2638 | Recent dup |
| Amborella_b4_c7113      | Amborella_b4_c771       | 1.5069 | 611  | Recent dup |
| Amborella_b4_c5525      | Amborella_b4_c772       | 1.1129 | 2381 | Recent dup |
| Amborella_b4_c8201      | Amborella_b4_c940       | 0.9651 | 32   | Recent dup |
| Amborella_b4_c4164      | Amborella_b4_c584       | 0.8319 | 1222 | Recent dup |
| Amborella_b4_c2722      | Amborella_b4_c4376      | 0.7287 | 642  | Recent dup |
| Amborella_b4_c19277     | Amborella_b4_c4233      | 0.3018 | 1736 | Recent dup |
| Amborella_b4_c17        | Amborella_b4_c37511     | 0.2599 | 1638 | Recent dup |
| Amborella_b4_c24344     | Amborella_b4_c694       | 0.2535 | 1346 | Recent dup |
| Amborella_b4_c1484      | Amborella_b4_rep_c89517 | 0.2235 | 4175 | Recent dup |
| Amborella_b4_c3486      | Amborella_b4_c7007      | 0.2127 | 2443 | Recent dup |
| Amborella_b4_c13428     | Amborella_b4_c24767     | 0.1584 | 441  | Recent dup |
| Amborella_b4_rep_c43092 | Amborella_b4_rep_c44167 | 0.1514 | 1041 | Recent dup |
| Amborella_b4_rep_c43163 | Amborella_b4_rep_c91576 | 0.1418 | 2903 | Recent dup |
| Amborella_b4_c25165     | Amborella_b4_c8936      | 0.1393 | 1289 | Recent dup |
| Amborella_b4_c20850     | Amborella_b4_c7029      | 0.1377 | 707  | Recent dup |
| Amborella_b4_rep_c48144 | Amborella_b4_rep_c73838 | 0.1325 | 1651 | Recent dup |
| Amborella_b4_c4904      | Amborella_b4_rep_c43438 | 0.1263 | 2263 | Recent dup |
| Amborella_b4_rep_c43168 | Amborella_b4_rep_c45186 | 0.1227 | 3450 | Recent dup |
| Amborella_b4_c427       | Amborella_b4_rep_c43972 | 0.1168 | 407  | Recent dup |
| Amborella_b4_c13545     | Amborella_b4_rep_c42788 | 0.116  | 4233 | Recent dup |

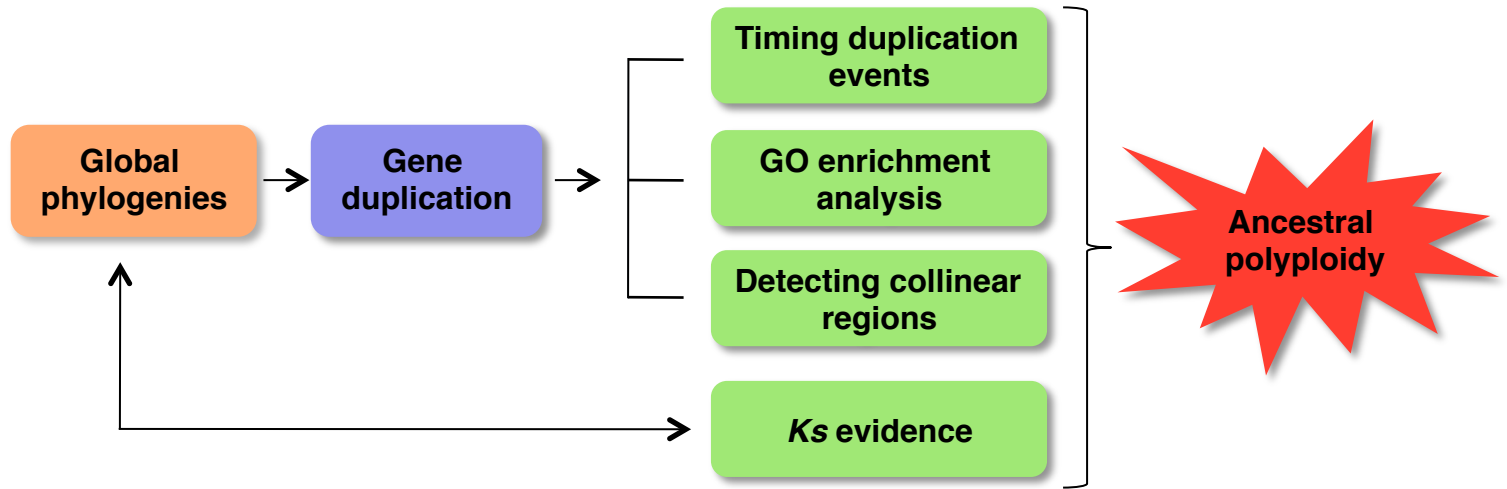

**Supplementary Figure 1. Schematic diagram detailing the main flows of data analysis.** In this study, we used a phylogenomic approach, along with supporting evidence from *Ks* analysis and collinear investigation, to unravel ancestral polyploidy events (WGD) that occurred before the split of monocots and eudicots.

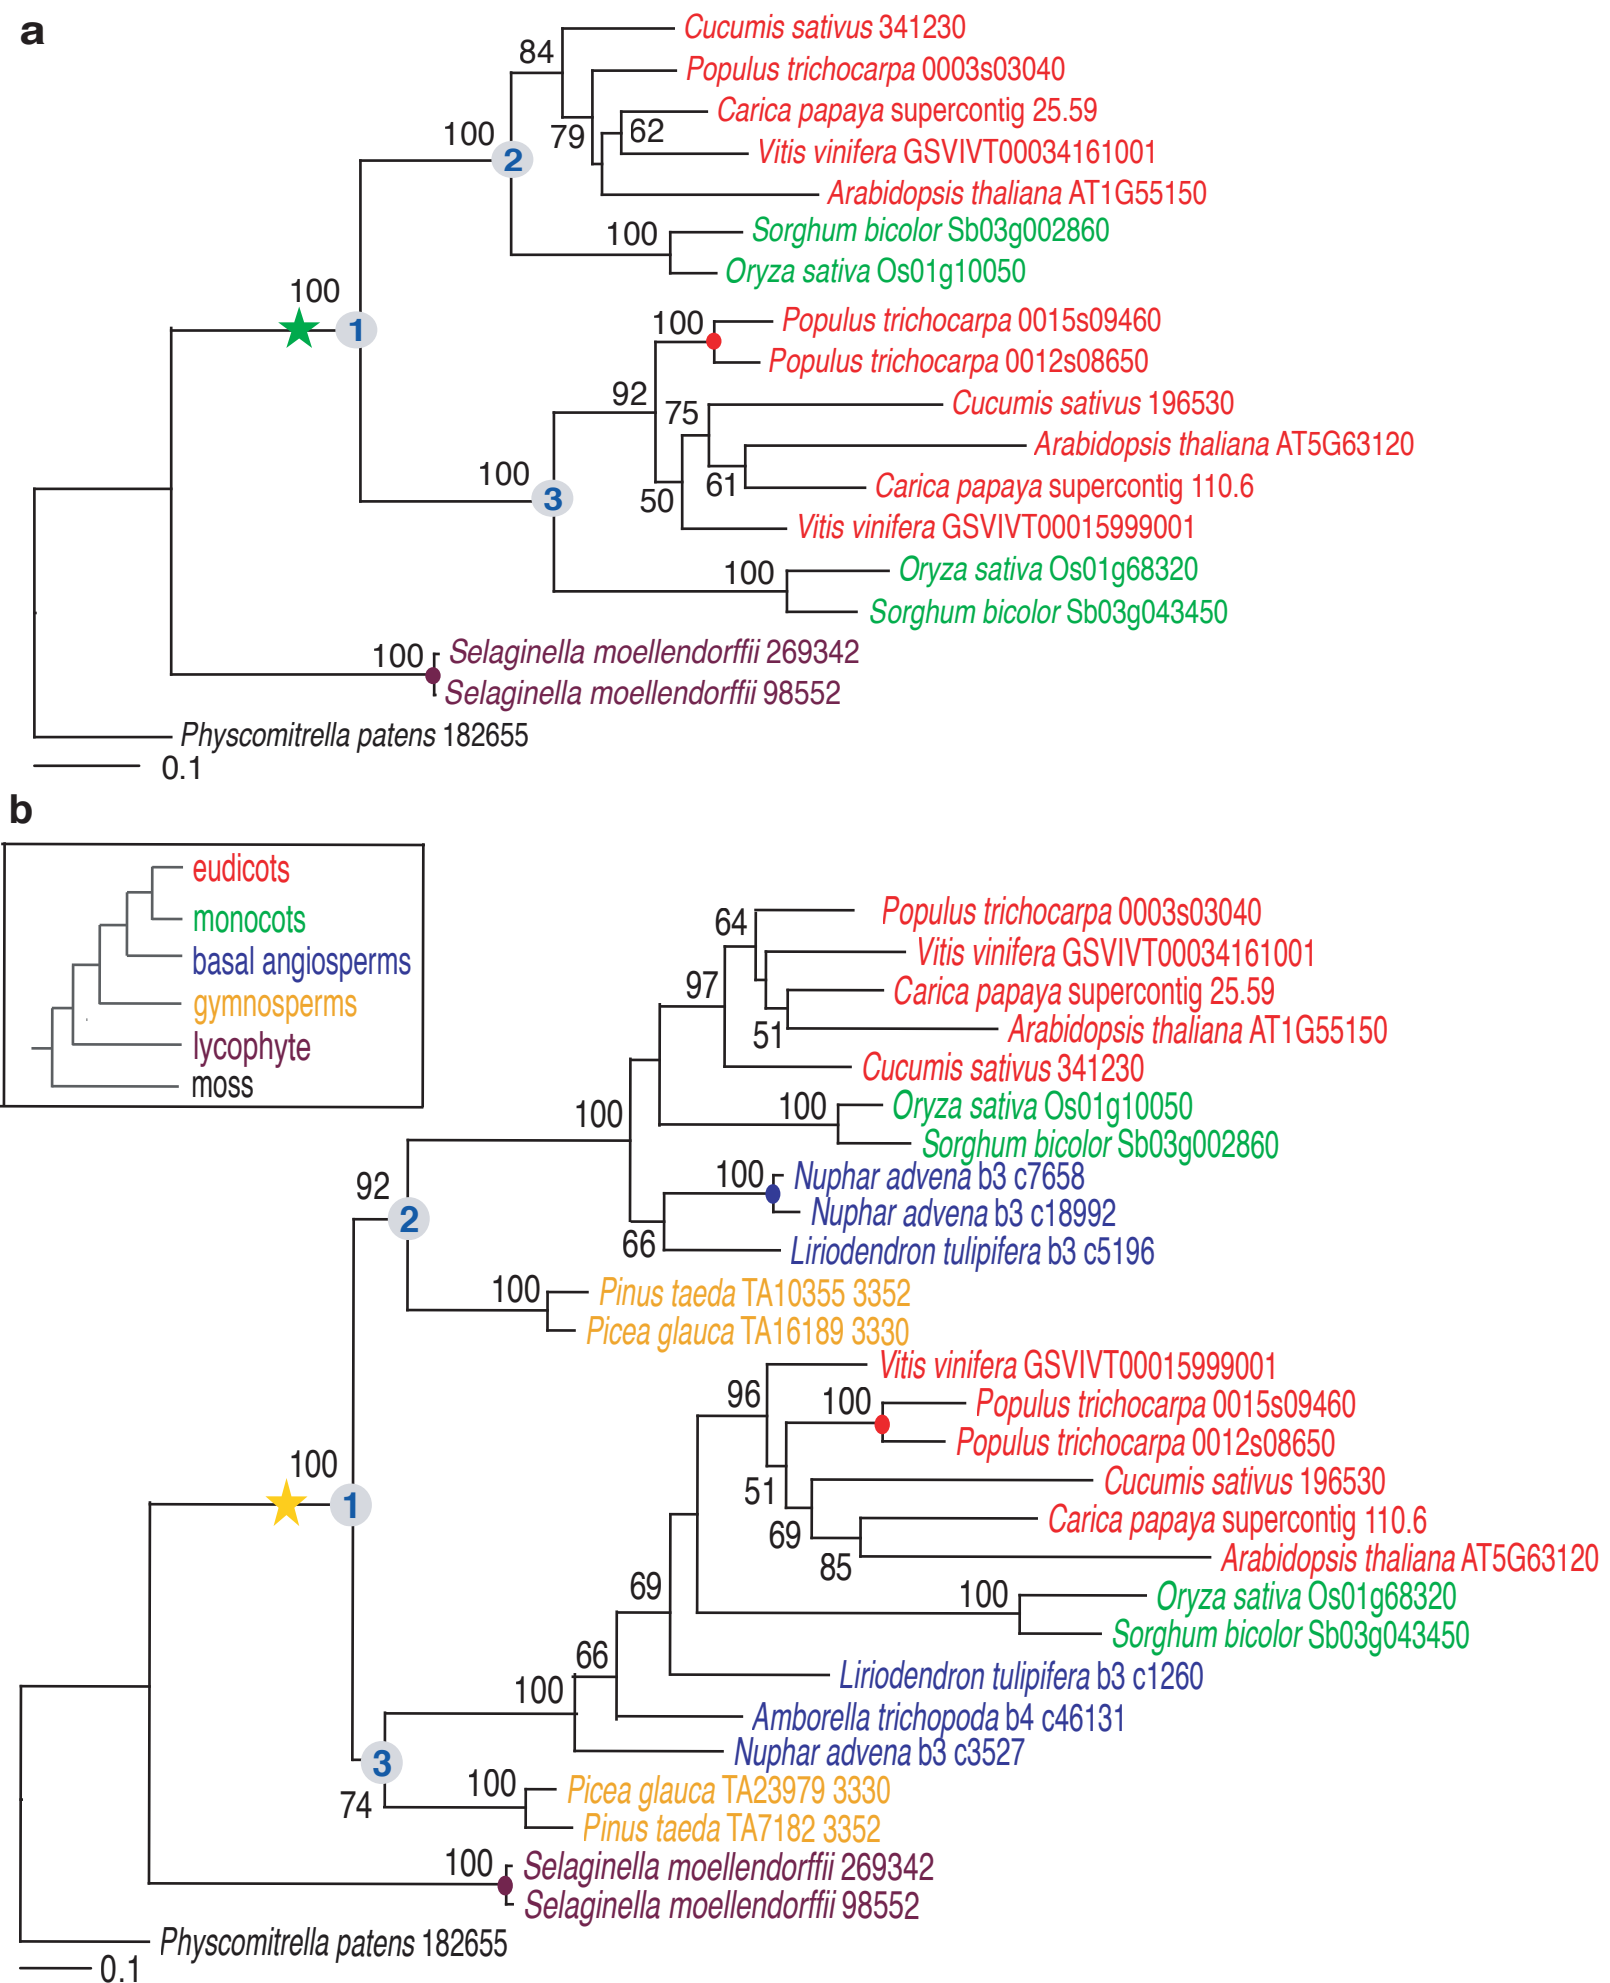

**Supplementary Figure 2. Exemplar ML phylogenies consistent with seed plant-wide duplication.** (a) RaxML topology of a core-orthogroup (Ortho 1711) where two major clades have survived the shared monocot and eudicot duplication. Since both of the duplicated clades (nodes #2 and #3) contained monocot and eudicot genes, we defined this duplication pattern as (ME)(ME). The scored BS value for this duplication is over 80%, because nodes #1 and #2 (and/or #3) have BS>80% (see “Scoring gene duplications” in Methods). (b) RaxML phylogeny of the core-orthogroup (Ortho 1711) with basal angiosperm and gymnosperm sequences added whose topology is consistent with seed plant-wide duplication. The scored BS value is over 80%, because nodes #1 and #2 have BS>80%. Legend: Green star = monocot+eudicot duplication; yellow star = seed plant duplication; colored circles = recent independent duplications; numbers = bootstrap support values.

**a**

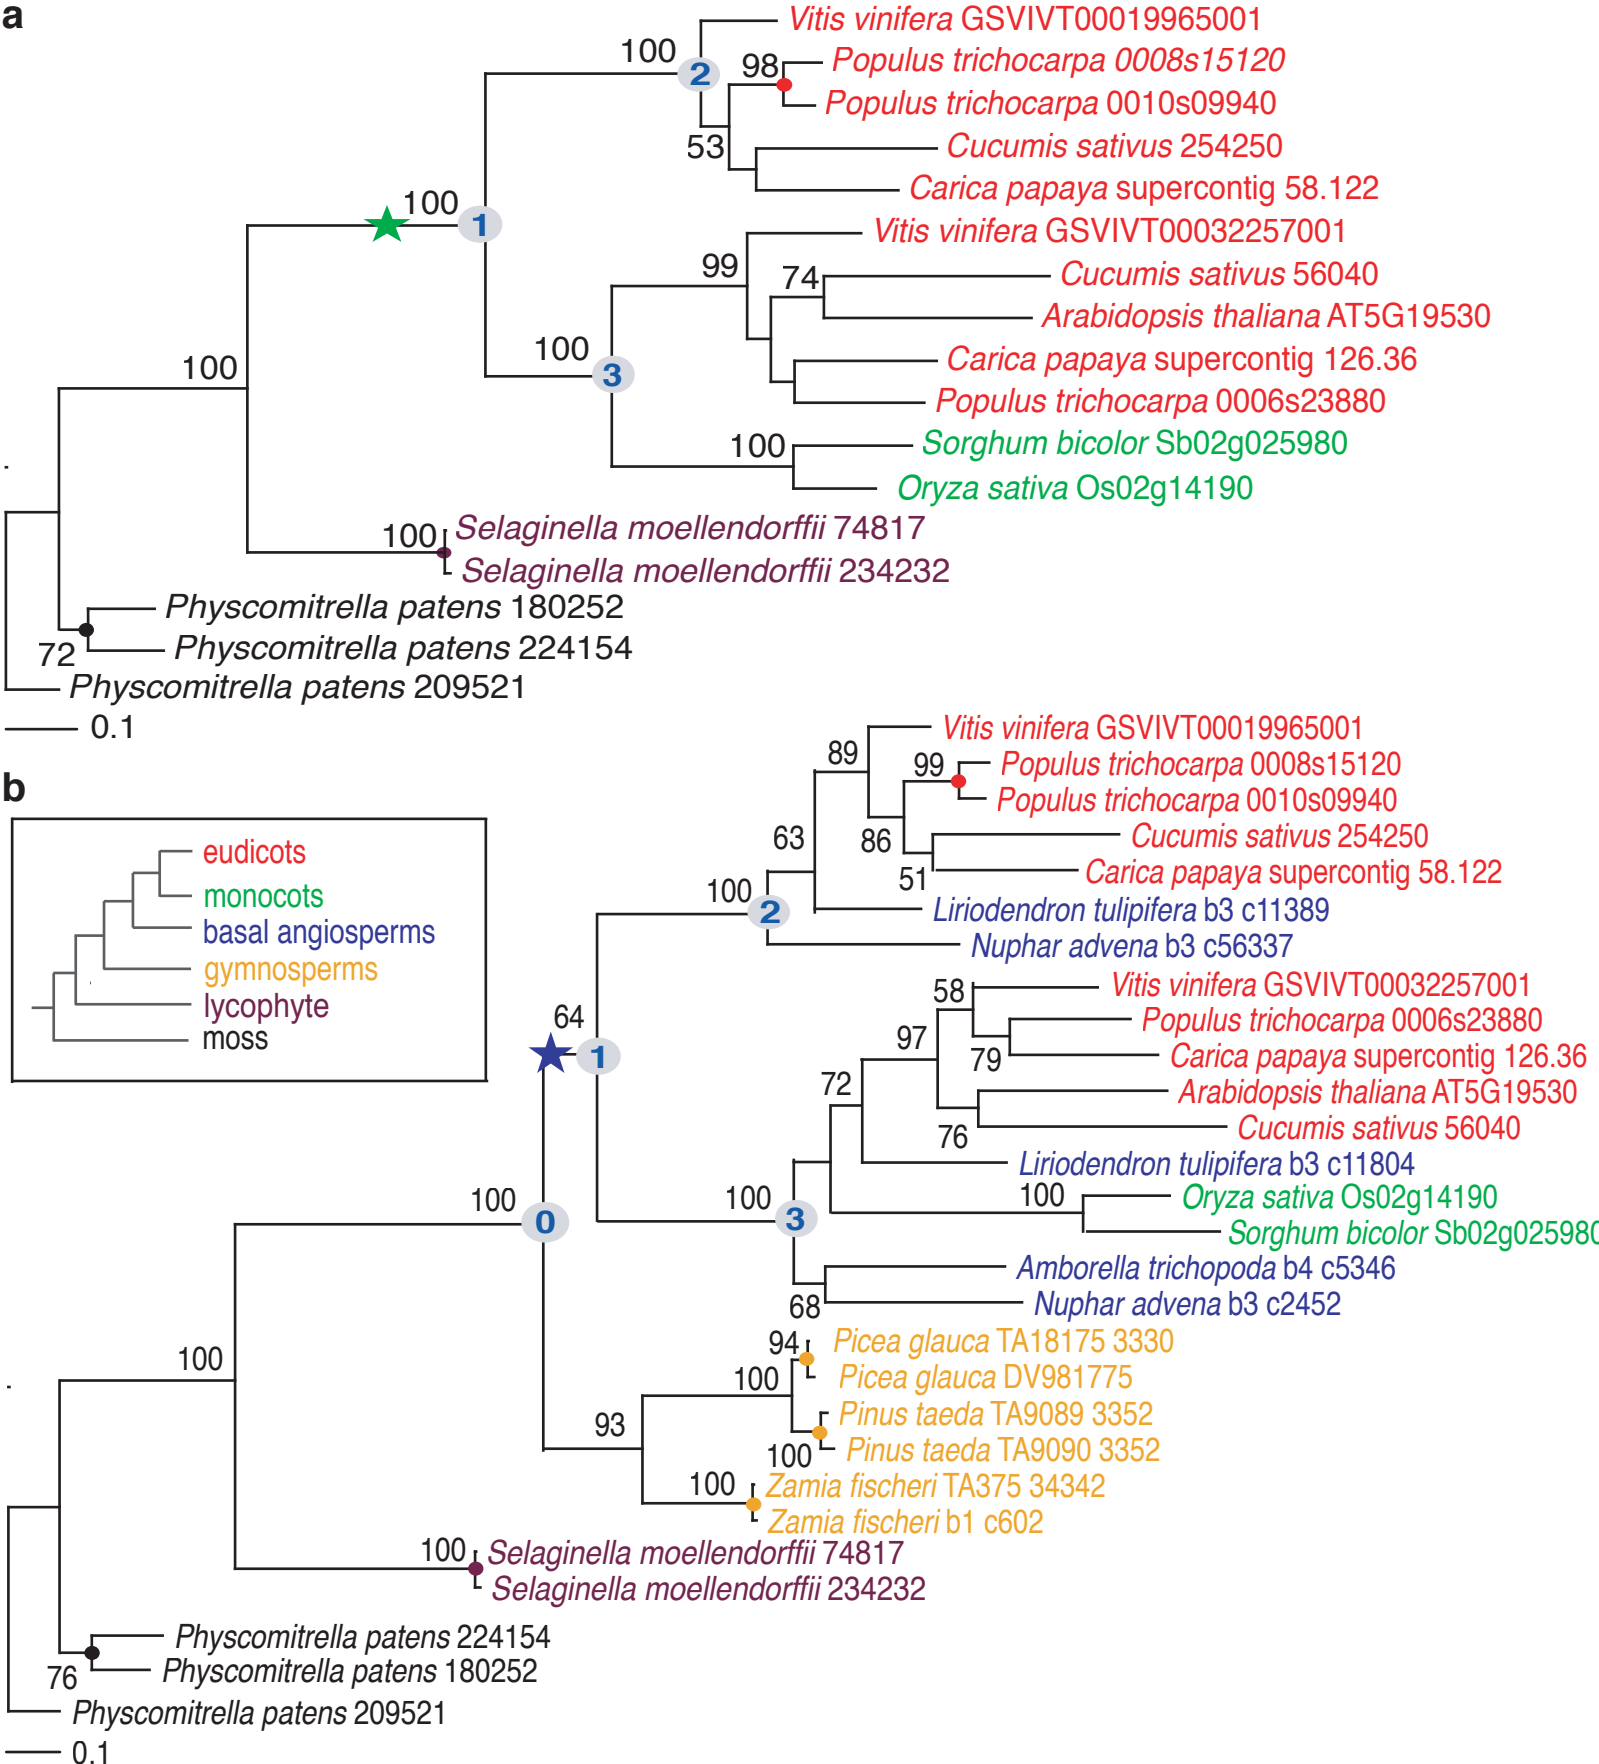

**Supplementary Figure 3. Exemplar ML phylogenies consistent with angiosperm-wide duplication.** (a) RaxML topology of a core-orthogroup (Ortho 2312) where two major clades have survived the shared monocot and eudicot duplication. The upper clade (node #2) only retains eudicot genes, while the lower clade (node #3) retains both monocot and eudicot genes. We defined this duplication pattern as (ME)(E). The scored BS value for this duplication is over 80% because nodes #1 and #2 (and/or #3) have BS values over 80%. (b) RaxML phylogeny of the Ortho 2312 with basal angiosperm and gymnosperm sequences added whose topology is consistent with an angiosperm-wide duplication not shared with gymnosperms. The scored BS is over 50%, because node #1 is over 50% and less than 80%. Symbols and colors same as for Supplementary Figure 2.

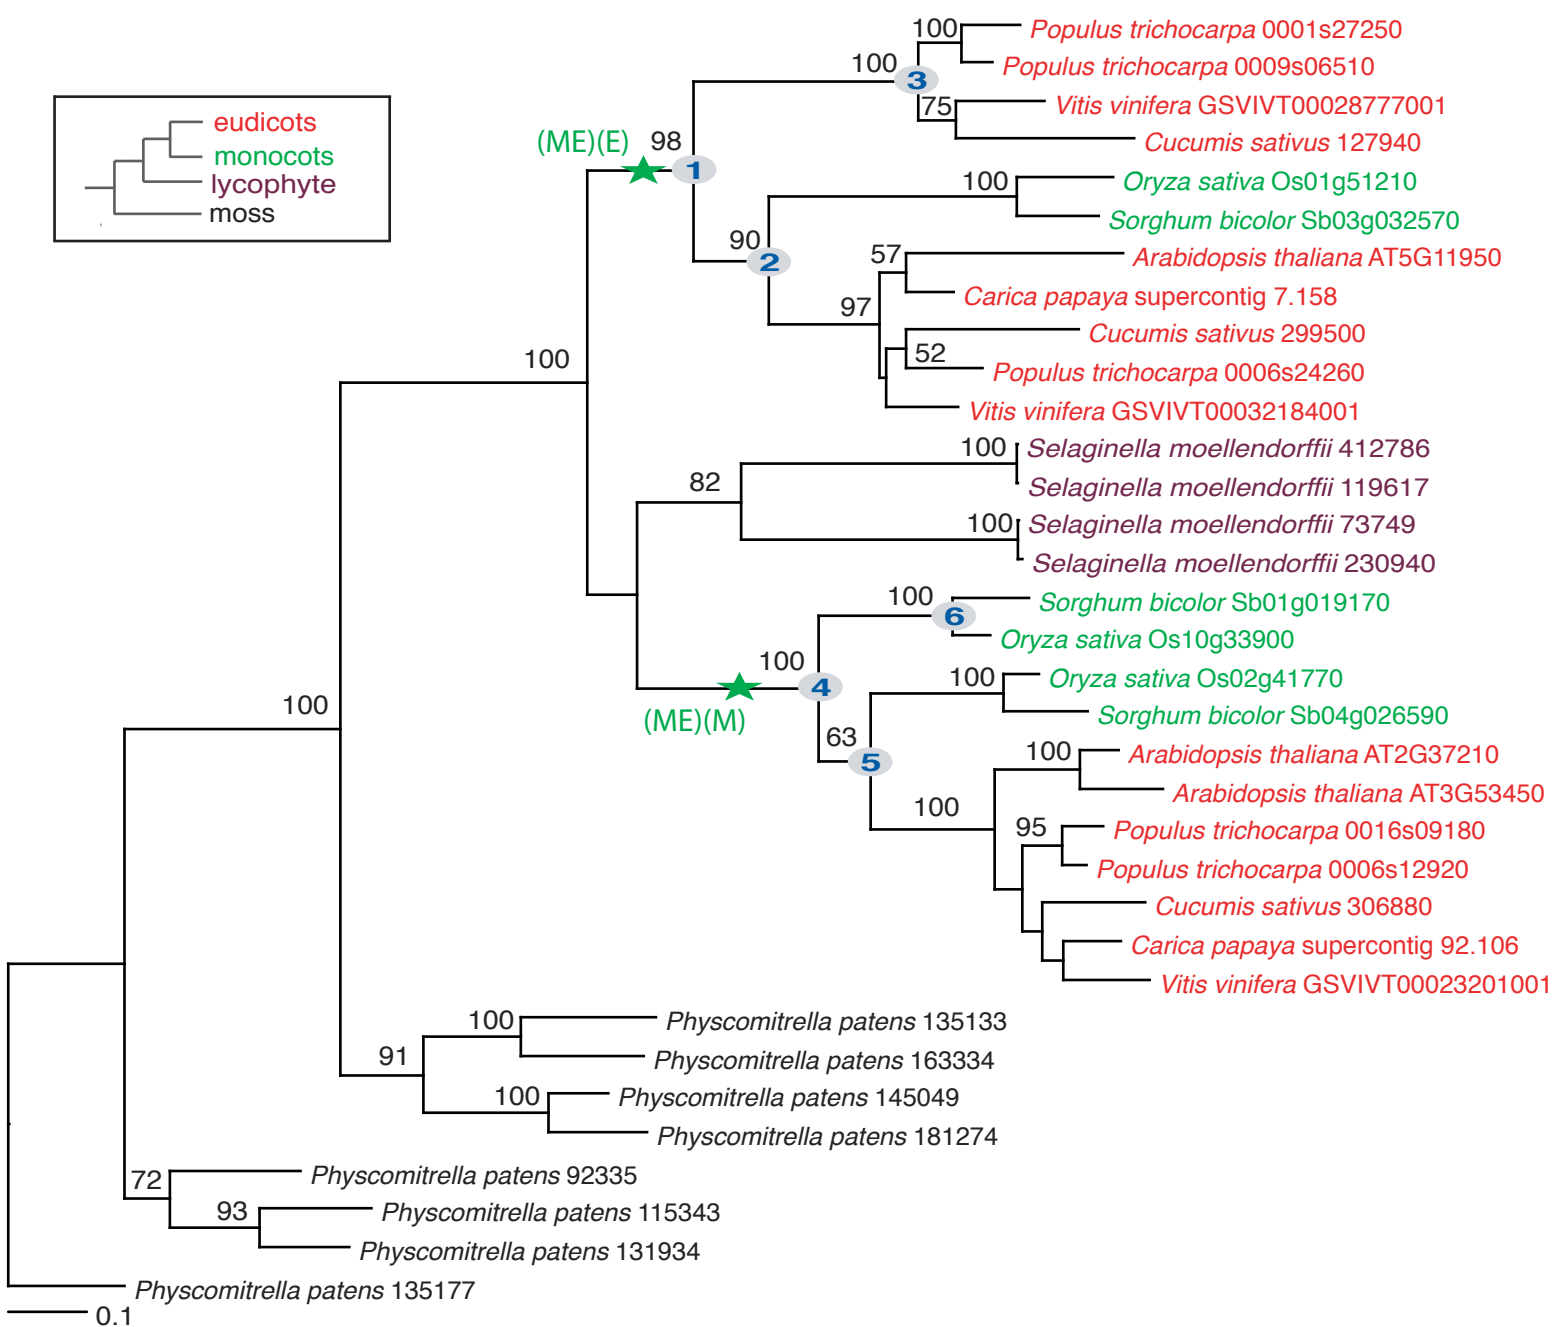

**Supplementary Figure 4. Exemplar ML phylogeny contains two types of ME duplication.**

RaxML topology of a core-orthogroup (Ortho 396) with two types of shared monocot and eudicot duplications surviving. The upper part of the tree was scored as (ME)(E) with bootstrap support over 80% (Type b), since both of the BS values of node #1 and #2 were over 80%. The lower part tree was scored as (ME)(M) with bootstrap support over 50% (Type c). If one of the paralogous clades had lost all monocot or eudicot genes, the BS value of the ME clade, together with the BS of the large clade, would have been used to determine the bootstrap support level of the duplication. For the lower part of the tree, the duplication was scored BS>50%, because the BS of node #5 is 63%, even though node #4 has BS>80%. This orthogroup was counted once as Type b and once as Type c of Analysis I. Symbols and colors same as for Supplementary Figure 2.



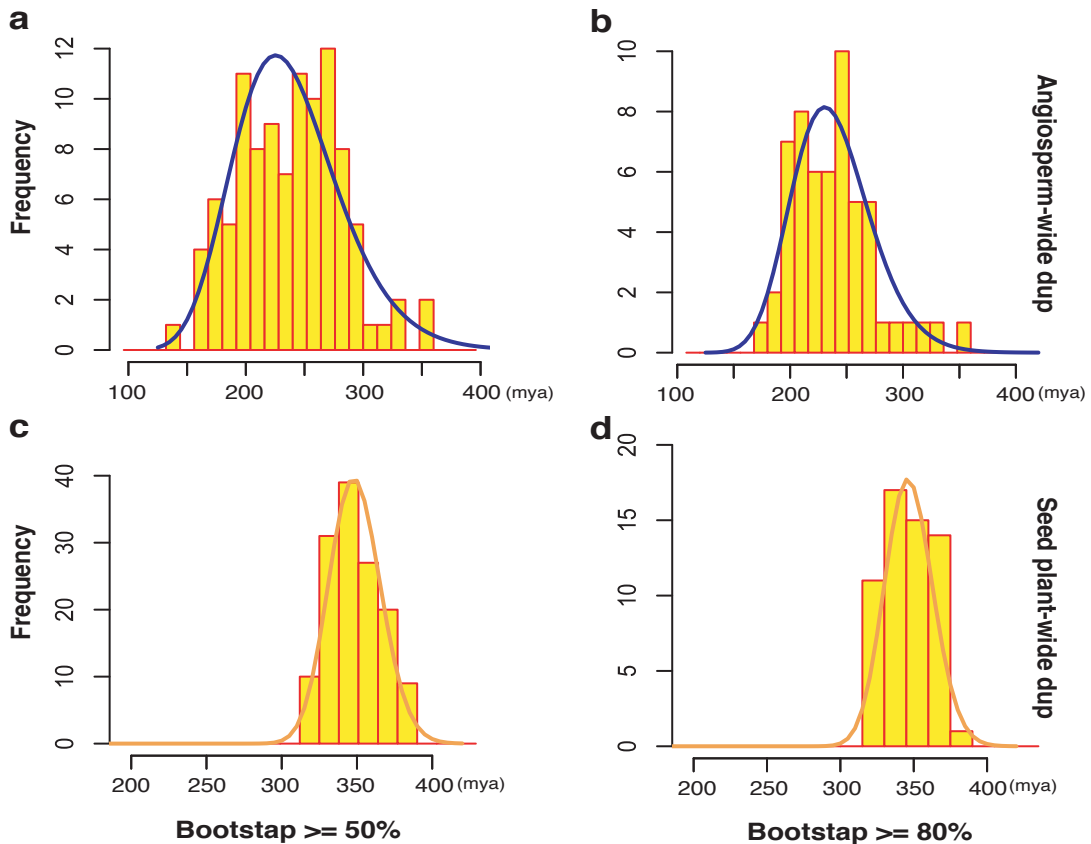

**Supplementary Figure 5: Age distributions of angiosperm-wide and seed plant-wide duplications estimated from phylogenies with gymnosperms.** In analysis III, both hypothetical topologies (type a and b) were supported by a large number of orthogroups, in which type a supports seed plant-wide duplication and type b support angiosperm-wide duplication. The divergence times of each type were analyzed by EMMIX. (a) and (b) Distributions of inferred divergence times from 110 and 59 orthogroups support angiosperm-wide duplication with bootstrap values over 50% and 80%, respectively. One significant component was identified by the mixture model in both panel (a): blue-234(mya)-1, and in panel (b): blue-236(mya)-1. (c) and (d) Distributions of inferred divergence times from 147 and 62 orthogroups support seed plant-wide duplication with bootstrap values over 50% and 80%, respectively. One significant component in (c): yellow-349(mya)-1, and one significant component in (d): yellow-347(mya)-1.



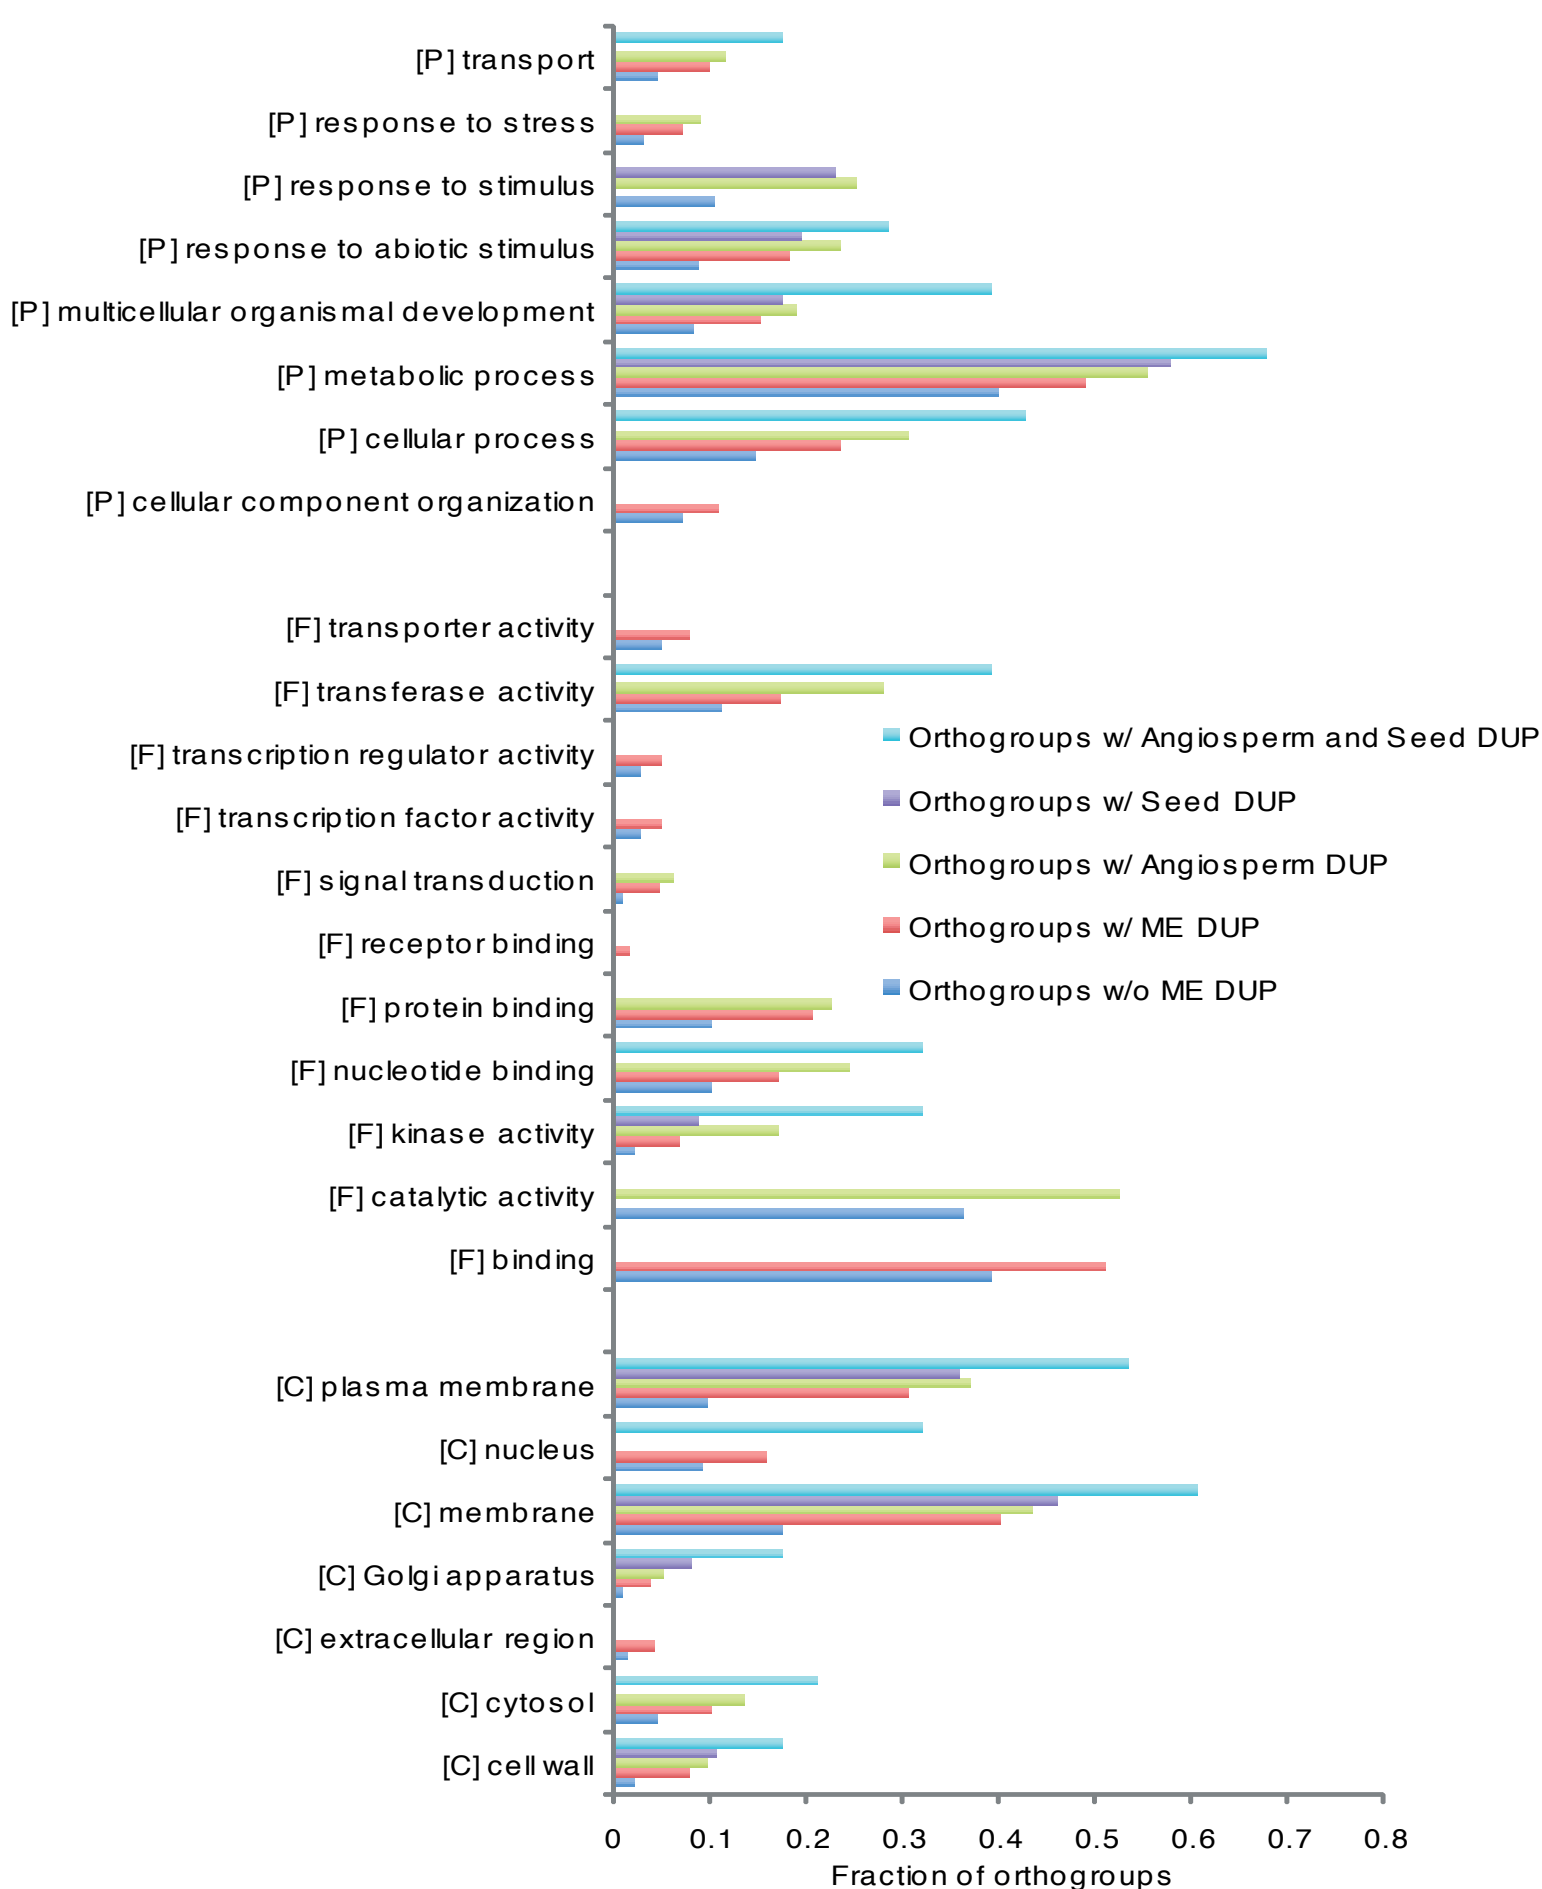

**Supplementary Figure 6: Functional categorization of orthogroups by GO annotation.** The orthogroups surviving ancient duplication (ME DUP , Angiosperm DUP, Seed plant DUP) and orthogroups without any of these ancient duplication were categorized by GO annotation. The results of statistical analysis were shown in Supplementary Data 3. The X-axis is the fraction of orthogroups mapped to the GO term and represents the abundance of the GO term. The fraction of orthogroups was calculated by the number of orthogroups mapped to the GO term divided by the number of all orthogroups in each category. [C] means GO cellular component categorization; [F] means GO functional categorization; [P] means GO biological process categorization.

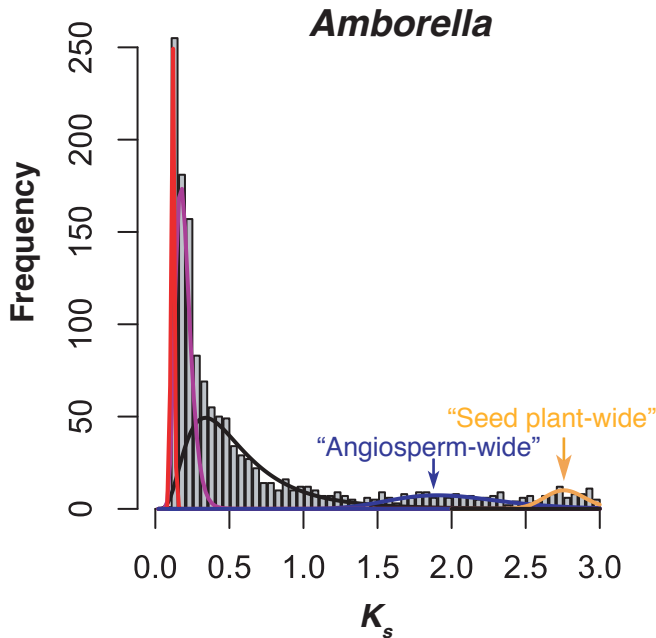

**Supplementary Figure 7:  $K_s$  distribution of 1365 paralogue pairs in *Amborella* support ancient genome duplications.** Pairwise  $K_s$  divergences for reciprocal ‘best hit’ genes in *Amborella* EST assembly (2,592,984 ESTs). Paralogous pairs of sequences were identified from best reciprocal matches in all-by-all BLASTN searches. Methods for sequence alignment and estimation of  $K_s$  were as reported (Cui, *et al.* 2006) except that only protein-coding sequences with inferred amino acid lengths >200bp were used for  $K_s$  calculations. Colored lines superimposed on  $K_s$  distribution represent significant duplication components identified by likelihood mixture model (see Methods). Graph shows “color-mean  $K_s$ -proportion” where color is the component (curve) color, and proportion is percentage of duplication nodes assigned to the identified component. Five statistically significant components: red-0.1164-0.10, purple-0.1868-0.32, black-0.4801-0.43, blue-1.9751-0.10, and yellow-2.7643-0.05.

**a**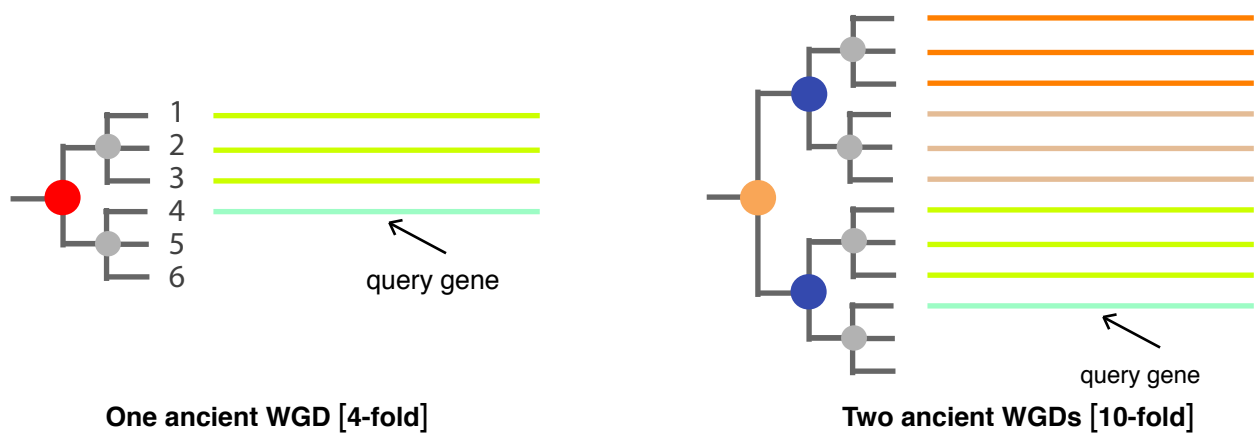**b**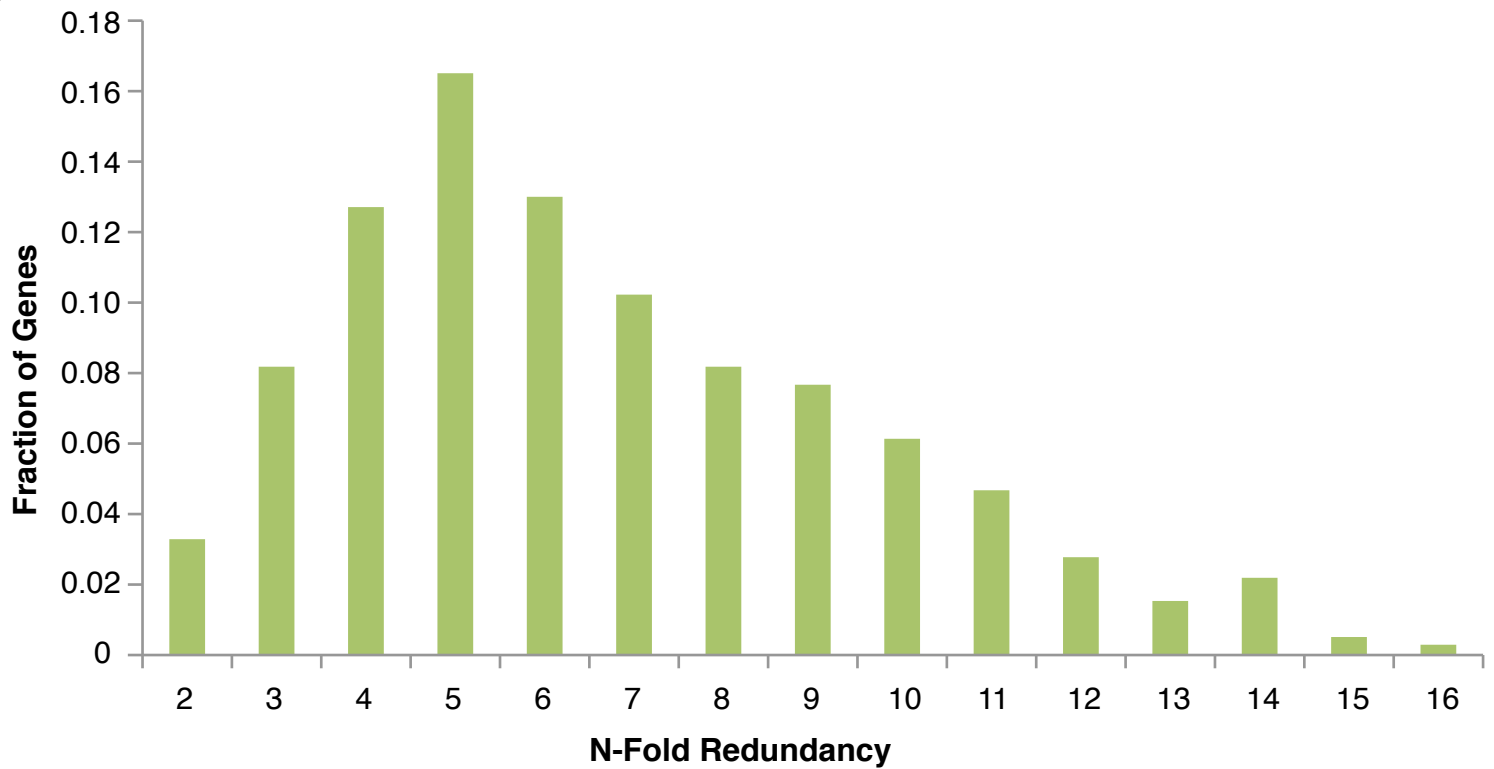

**Supplementary Figure 8: The estimate of *N*-fold redundancy.** (a) The expected fold redundancy for hypotheses of one ancient WGD and two ancient WGDs in the history of the *Vitis* lineage. If one ancient WGD before the monocot-eudicot separation, six *Vitis* genes would be expected on the phylogenetic tree if there is no gene loss (a, left). In this case, we would identify 9 gene pairs supporting an ancient duplication before monocot-eudicot separation, which are (1,4), (1,5), (1,6), (2,4), (2,5), (2,6), (3,4), (3,5), (3,6). Each gene would have another 3 paralogous genes on the phylogenetic tree, not including younger duplicates generated by the  $\gamma$  triplication. For example, gene 4 (query gene) would detect gene 1, 2, 3 as homologous genes. Therefore, the genome region where gene 4 was located would be expected to find another three paralogous regions across the *Vitis* genome. Therefore, one ancient WGD would lead to 4-fold redundancy (including the query). Using the same logic, two ancient WGDs would lead to 10-fold redundancy. Red filled circle refers to one ancient WGD predating the monocot-eudicot split. Yellow filled circle indicates the seed plant-wide duplication ( $\zeta$ ). Blue filled circles refer to the angiosperm-wide duplication ( $\epsilon$ ). Gray filled circles denote the triplication  $\gamma$  event. (b) The histogram is generated by counting the redundancy across all *Vitis* chromosomes for each query gene as shown in the lower part of Supplementary Data 4. The peak at 5-fold coverage (including the query gene) means that the largest fraction of genes could detect another 4 paralogs in other regions of the genome. This is consistent with two ancient WGDs plus a more recent  $\gamma$  event.
